# Supplementary material for: Postnatal development in a marsupial model, the fat-tailed dunnart (Sminthopsis crassicaudata; Dasyuromorphia: Dasyuridae)
Source: PubMed Central journal article supplement (PMC8413461; doi:10.1038/s42003-021-02506-2), 2021-09-02
Supplement: 42003_2021_2506_MOESM1_ESM.pdf [file 42003_2021_2506_MOESM1_ESM.pdf]

## **Supplementary Information for:**

Postnatal development in a marsupial model, the fat-tailed dunnart (*Sminthopsis crassicaudata*; Dasyuromorphia: Dasyuridae)

Laura E. Cook<sup>1</sup>, Axel H. Newton<sup>2</sup>, Christy A Hipsley<sup>1,3,4</sup>, Andrew J. Pask<sup>1,4\*</sup>

**1** School of Biosciences, University of Melbourne, Royal Parade, Parkville, Victoria, Australia

**2** Department of Anatomy and Developmental Biology, Monash University, Clayton, Victoria, Australia

**3** Department of Biology, University of Copenhagen, Copenhagen, Australia

**4** Department of Sciences, Museums Victoria, Carlton, Victoria, Australia

\* To whom correspondence should be addressed: [ajpask@unimelb.edu.au](mailto:ajpask@unimelb.edu.au)

## Supplementary Figures

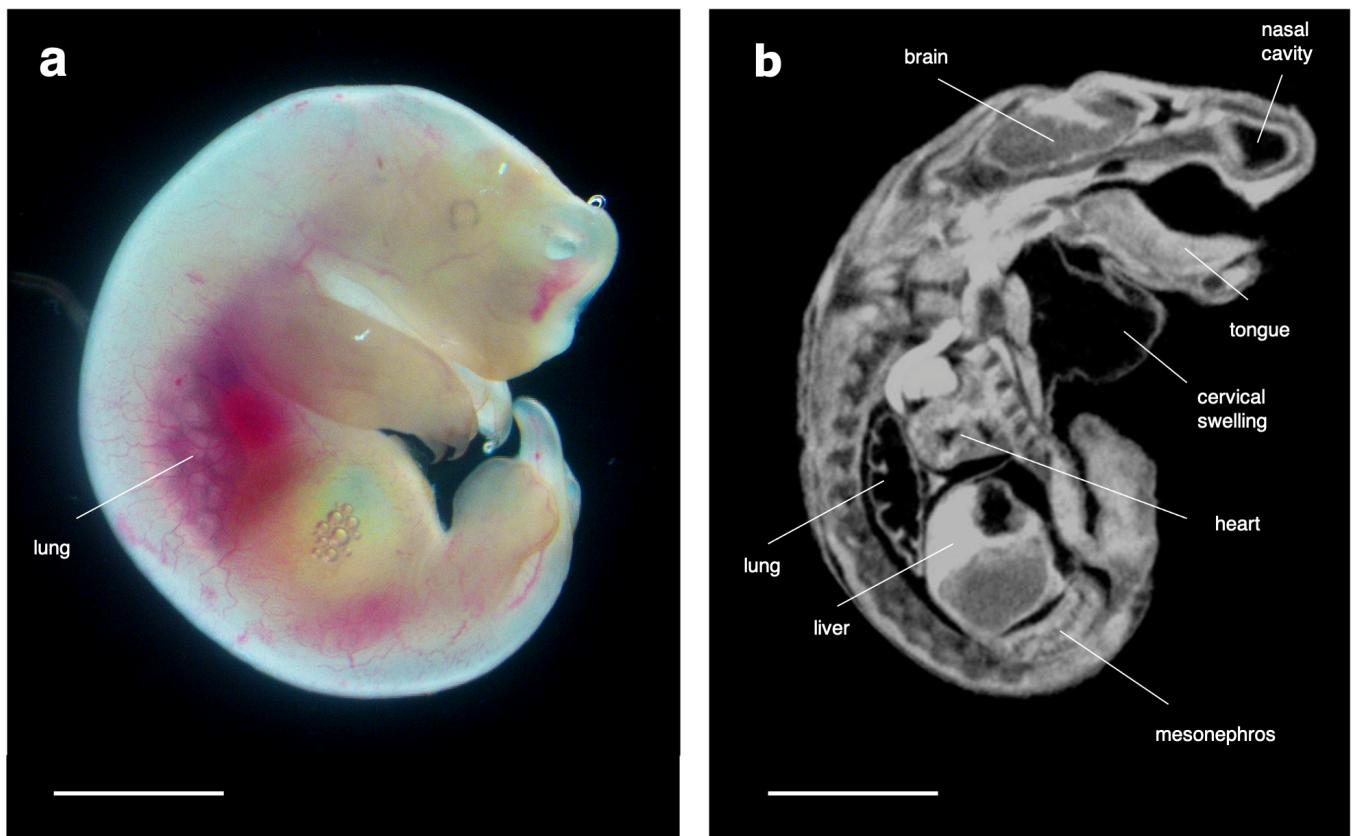

**Supplementary Figure 1.** Fat-tailed dunnart on the day of birth. **a** Right lateral wholemount image. **b** Sagittal slice from microCT scan highlighting internal organs. Scale bar = 1mm.

E11.5 mouse

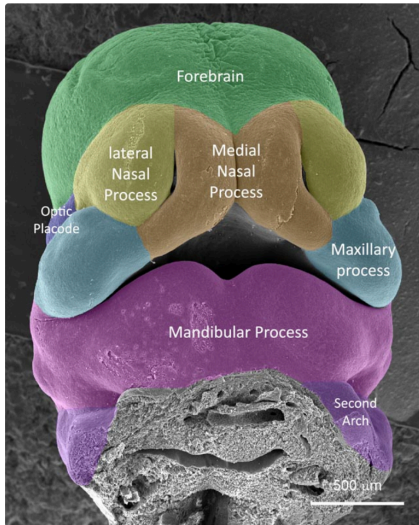

E12 mouse

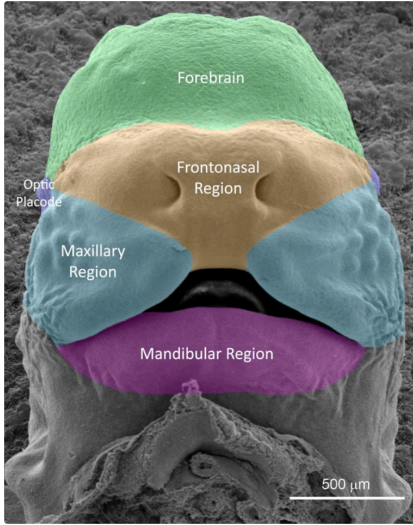

D0 dunnart

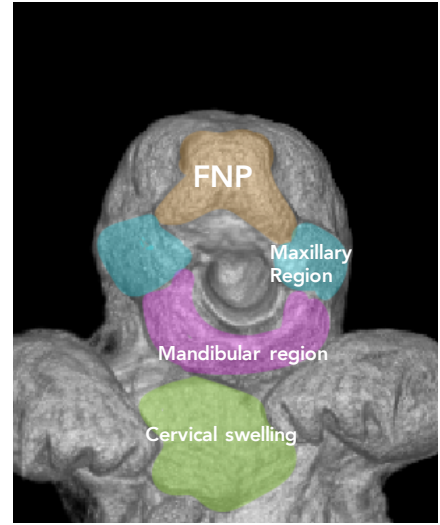

**Supplementary Figure 2.** Color-coded scanning electron microscopy images for C57BL/6 mouse embryo craniofacial anatomy at embryonic stage (E) E11.5 and E12 [1,2] alongside microCT surface reconstruction of D0 *S. crassicaudata*. FNP = frontonasal process.

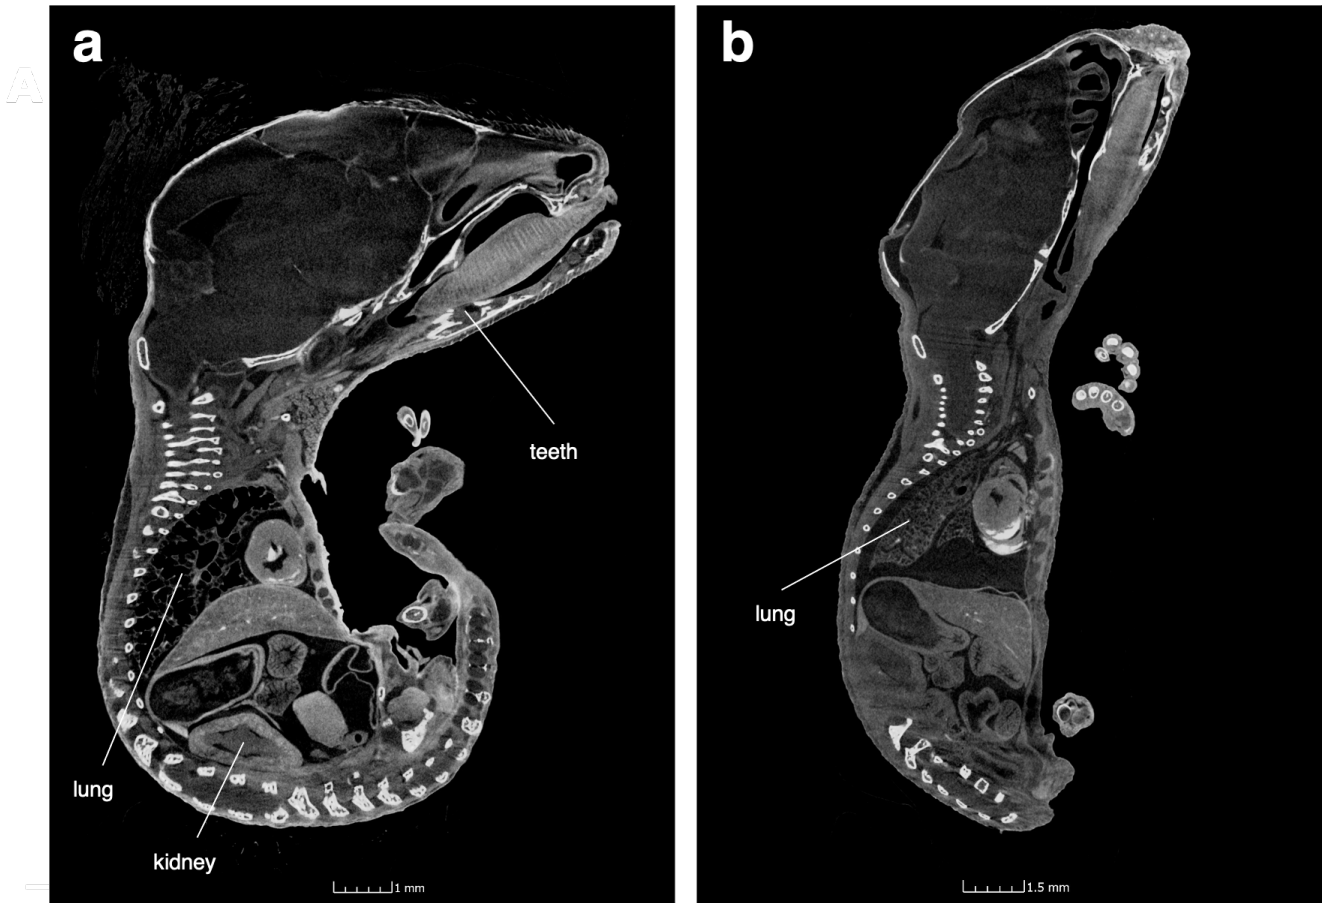

**Supplementary Figure 3.** Sagittal slice from a microCT volume rendering of the fat-tailed dunnart **a** D30, and **b** D35.



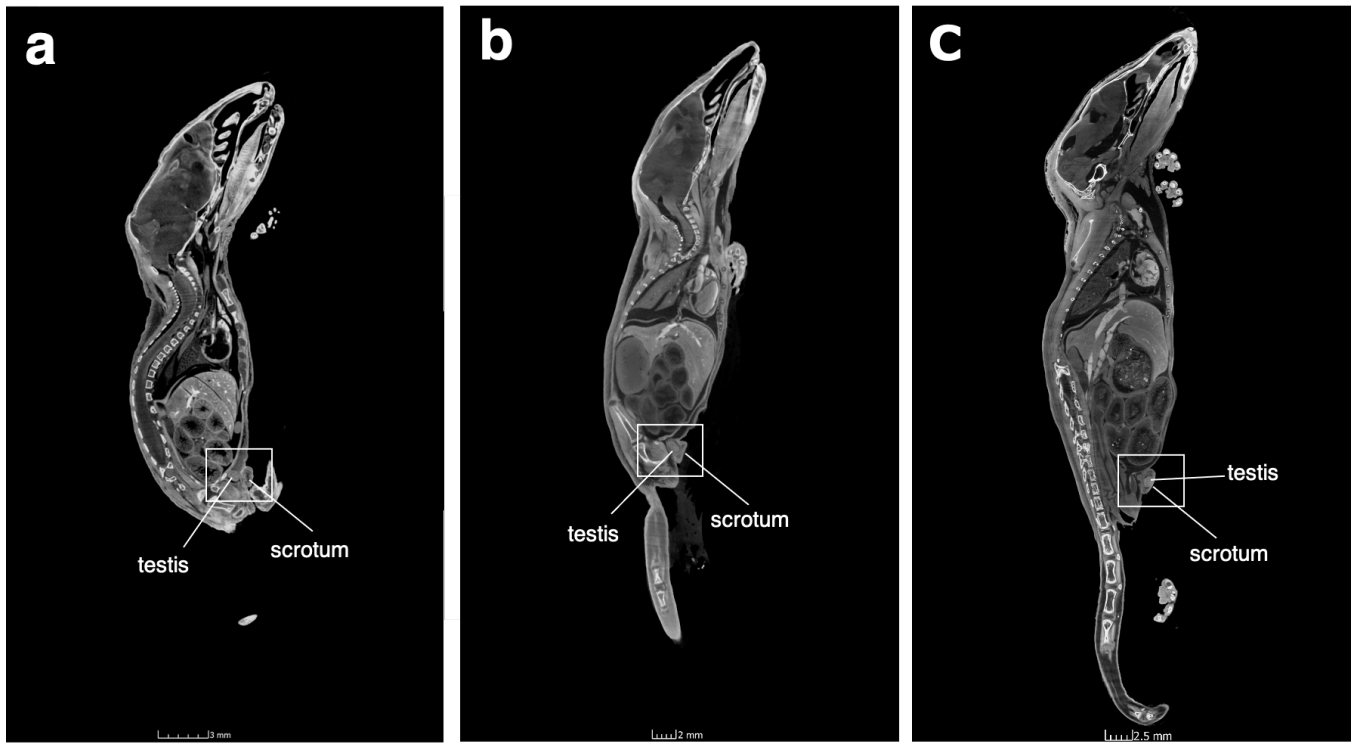

**Supplementary Figure 4.** Sagittal slice from a microCT volume rendering of the fat-tailed dunnart **a** D40, **b** D50, and **c** D60.

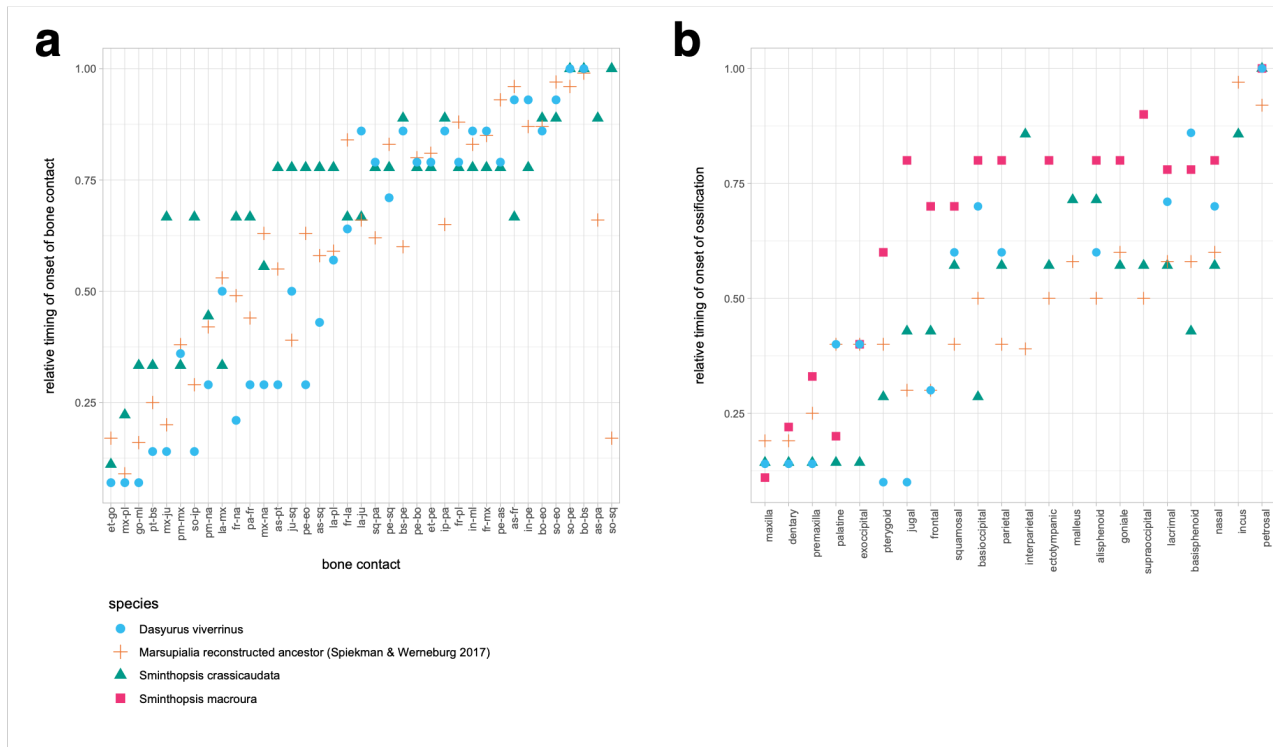

**Supplementary Figure 5. a** Relative timing of onset of bone contacts and **a** onset of ossification for *S. crassicaudata* (this study), *D. viverrinus* [3,4] and the reconstructed ancestor of Marsupialia [5].

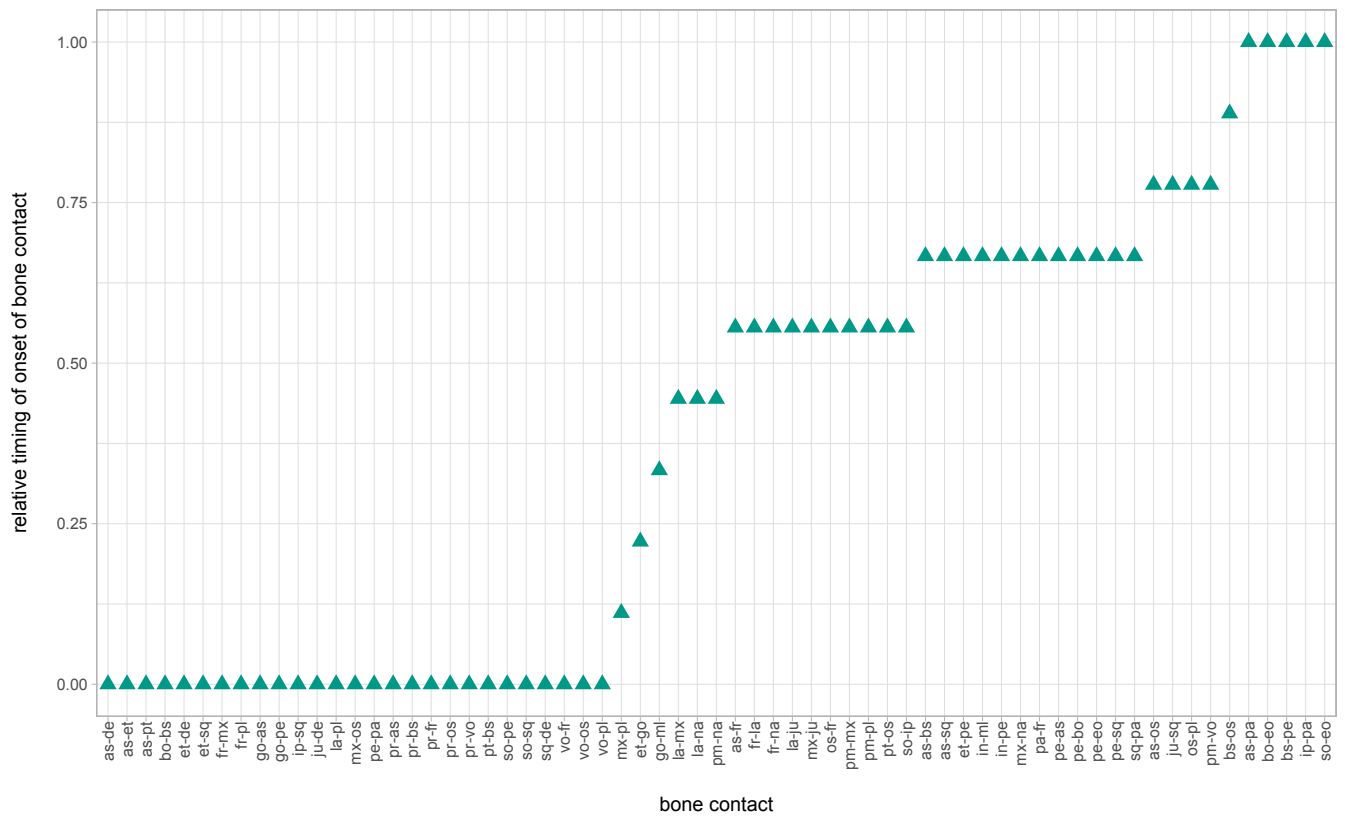

**Supplementary Figure 6.** Relative timing of onset of bone contacts for the bones of the skull in *S. crassicaudata*.

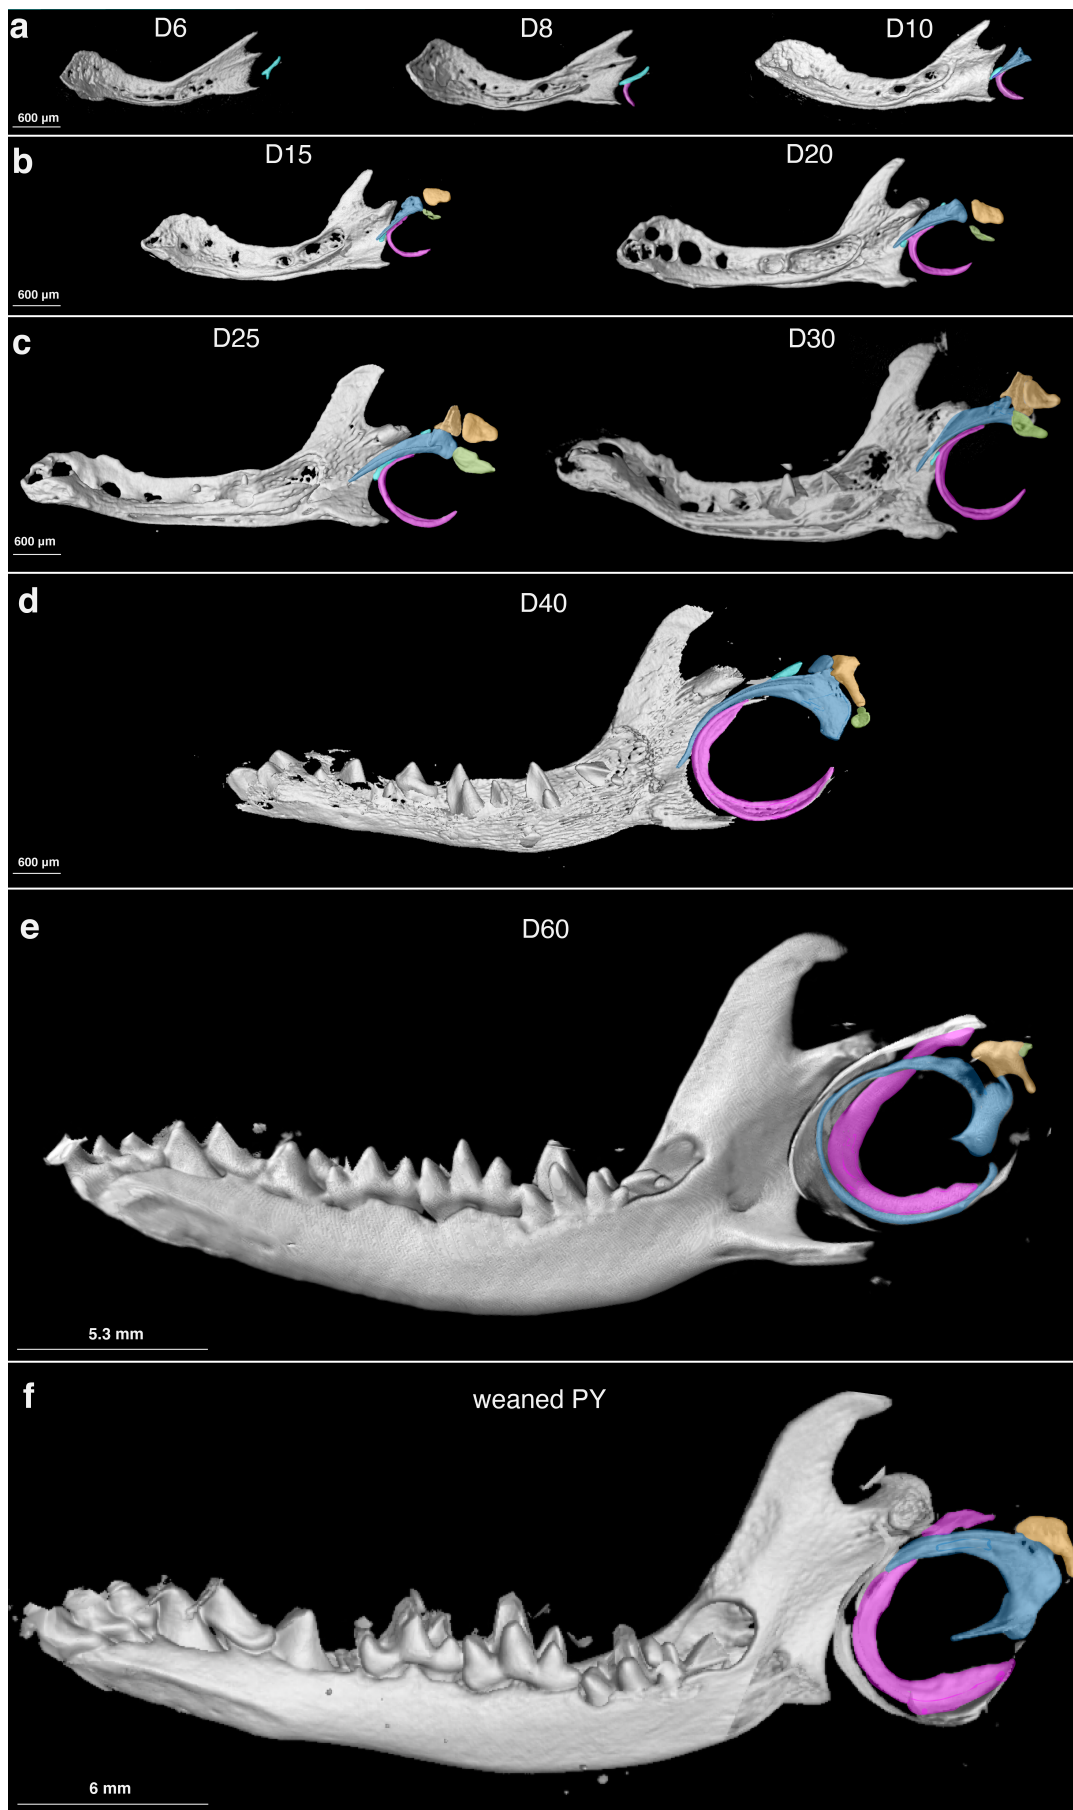

**Supplementary Figure 7.** Development of the lower jaw and inner ear bones as revealed by microCT in fat-tailed dunnart pouch young. **a** D6, D8 and D10, **b** D15 and D20, **c** D25 and D30, **d** D40, **e** D60, **f** weaned juvenile pouch young. Goniale (light blue), ectotympanic ring (purple), incus (yellow), malleus (blue) and stapes (light green).

## Supplementary Tables

**Supplementary Table 1.** Onset of bone contacts with age and rankings observed in the cranial skeleton of *S. crassicaudata* pouch young.

| <b>Bone contact</b>          | <b>Age (days)</b> | <b>Rank</b> |
|------------------------------|-------------------|-------------|
| ectotympanoid-goniale        | 5                 | 1           |
| maxilla-palatine             | 8                 | 2           |
| goniale-malleus              | 10                | 3           |
| lacrimal-maxilla             | 10                | 3           |
| premaxilla-maxilla           | 10                | 3           |
| premaxilla-nasal             | 15                | 4           |
| maxilla-nasal                | 25                | 5           |
| supraoccipital-interparietal | 30                | 6           |
| parietal-frontal             | 30                | 6           |
| frontal-nasal                | 30                | 6           |
| lacrimal-jugal               | 30                | 6           |
| maxilla-jugal                | 30                | 6           |
| frontal-lacrimal             | 30                | 6           |
| alisphenoid-frontal          | 30                | 6           |
| squamosal-parietal           | 35                | 7           |
| alisphenoid-squamosal        | 35                | 7           |
| alisphenoid-pterygoid        | 35                | 7           |
| lacrimal-palatine            | 35                | 7           |
| jugal-squamosal              | 35                | 7           |
| petrosal-exoccipital         | 35                | 7           |
| petrosal-basioccipital       | 35                | 7           |
| petrosal-squamosal           | 35                | 7           |
| petrosal-alisphenoid         | 35                | 7           |
| incus-malleus                | 35                | 7           |
| incus-petrosal               | 35                | 7           |
| ectotympic-petrosal          | 35                | 7           |
| frontal-maxilla              | 35                | 7           |
| frontal-palatine             | 35                | 7           |
| interparietal-parietal       | 60                | 8           |
| basisphenoid-petrosal        | 60                | 8           |
| alisphenoid-parietal         | 60                | 8           |
| basioccipital-exoccipital    | 60                | 8           |
| supraoccipital-exoccipital   | 60                | 8           |
| basioccipital-basisphenoid   | w.juv             | 9           |
| supraoccipital-squamosal     | w.juv             | 9           |
| supraoccipital-petrosal      | w.juv             | 9           |

**Supplementary Table 2.** Average weight, head length and crown-rump length for fat-tailed dunnart pouch young.

| Age (days) | n | Weight (g)      | Head length (mm) | Crown-rump length (mm) |
|------------|---|-----------------|------------------|------------------------|
| 0          | 9 | 0.0162 ± 0.0004 | 2.40 ± 0.05      | 4.32 ± 0.06            |
| 1          | 3 | 0.0170 ± 0.0003 | 2.71 ± 0.03      | 4.52 ± 0.01            |
| 2          | 2 | 0.0329 ± 0.0005 | 2.93 ± 0.005     | 5.13 ± 0.03            |
| 3          | 4 | 0.0391 ± 0.0020 | 3.38 ± 0.18      | 5.43 ± 0.07            |
| 4          | 8 | 0.0430 ± 0.0012 | 3.40 ± 0.13      | 5.73 ± 0.09            |
| 5          | 4 | 0.0556 ± 0.0018 | 4.44 ± 0.08      | 6.53 ± 0.08            |
| 6          | 2 | 0.0601 ± 0.0018 | 4.51 ± 0.18      | 7.03 ± 0.09            |
| 7          | 2 | 0.0601 ± 0.0005 | 4.89 ± 0.07      | 7.00 ± 0.07            |
| 8          | 2 | 0.0685 ± 0.0043 | 4.83 ± 0.24      | 7.52 ± 0.15            |
| 9          | 2 | 0.0759 ± 0.0022 | 5.15             | 7.5 ± 0.02             |
| 10         | 2 | 0.0816 ± 0.0063 | 5.38 ± 0.14      | 8.79 ± 0.02            |
| 15         | 2 | 0.1199 ± 0.0131 | 5.93 ± 0.34      | 10.02 ± 0.16           |
| 20         | 2 | 0.1879 ± 0.0048 | 6.75 ± 0.12      | 12.51 ± 0.01           |
| 25         | 6 | 0.2834 ± 0.0041 | 7.90 ± 0.04      | 15.76 ± 0.027          |
| 30         | 1 | 0.3239          | 8.47             | 14.09                  |
| 35         | 1 | 0.5531          | 10.15            | 20.13                  |
| 40         | 1 | 1.1996          | 13.84            | 27.13                  |
| 50         | 1 | 3.432           | 18.21            | 38.38                  |
| 60         | 1 | 5.222           | 21.48            | 44.62                  |



## Supplementary References

1. Iwata, J., Bringas, P. & Chai, Y. Color-coded scanning electron microscopy images of C57BL/6 mouse embryos. *FaceBase Consortium*, <https://www.facebase.org/mouseanatomy> (Accessed: April 2021).
2. Brinkley, J. F. *et al.* The FaceBase Consortium: a comprehensive resource for craniofacial researchers. *Development* **143**, 2677–2688, 10.1242/dev.135434 (2016).
3. Fawcett, E. The primordial cranium of *Erinaceus europaeus*. *Journal of Anatomy* **52**, 211–250.45 (1918).
4. Nunn, C. L. & Smith, K. K. Statistical analyses of developmental sequences: the craniofacial region in marsupial and placental mammals. *The American Naturalist* **152**, 82–101 (1998).
5. Spiekman, S. N. F. & Werneburg, I. Patterns in the bony skull development of marsupials: high variation in onset of ossification and conserved regions of bone contact. *Sci Rep* **7**, 11, 10.1038/srep43197 (2017).
